# Supplementary material for: Characterization of acute TLR-7 agonist-induced hemorrhagic myocarditis in mice by multiparametric quantitative cardiac magnetic resonance imaging
Source: PubMed Central journal article supplement (PMC6737951; doi:10.1242/dmm.040725), 2019-08-16
Supplement: dmm-12-040725-s1.pdf [file dmm-12-040725-s1.pdf]

Supplementary Figure 1

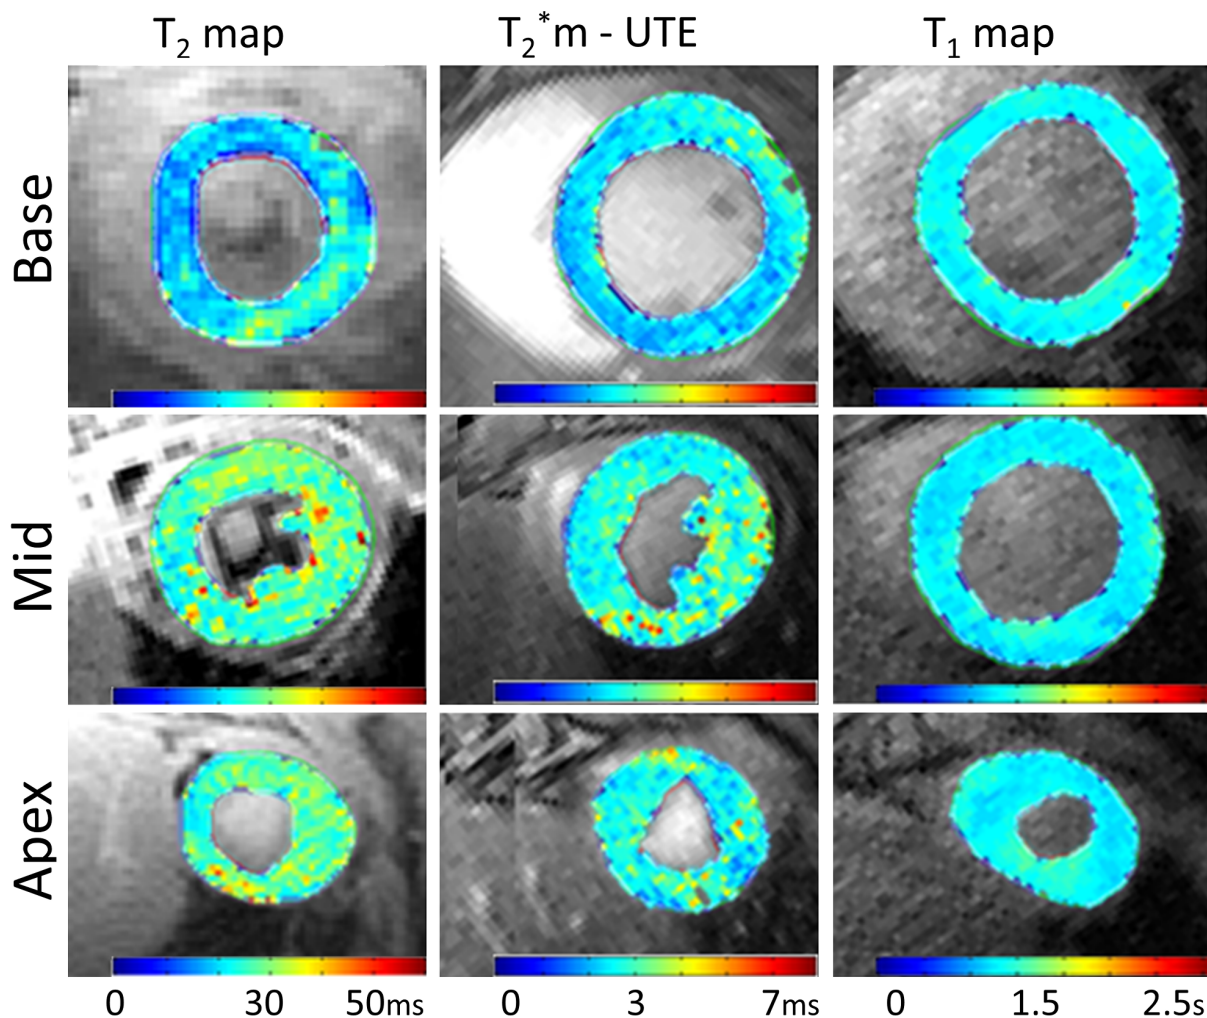

|                                       |                                              |                                                          |                                                            |
|---------------------------------------|----------------------------------------------|----------------------------------------------------------|------------------------------------------------------------|
| <b>MRI Methods</b>                    | T <sub>2</sub> map (MSSE)<br>Base, Mid, Apex | T <sub>2</sub> <sup>*</sup> map (UTE)<br>Base, Mid, Apex | Native T <sub>1</sub> map (Look-Locker)<br>Base, Mid, Apex |
| <b>Diffuse myocardial involvement</b> | Oedema/<br>Inflammation                      | Bleeding/Iron                                            | Diffuse fibrosis                                           |
|                                       | ~ 4 min/slice                                | ~ 14 min/slice                                           | ~ 4 min 30s /slice<br>No contrast agent                    |

**Figure S1:** Improved multi-parametric approach to assess tissue damage by T<sub>1</sub>, T<sub>2</sub> and T<sub>2</sub><sup>\*</sup> mapping. Representative T<sub>1</sub>, T<sub>2</sub><sup>\*</sup> and T<sub>2</sub> maps acquired at base, midsection and apex of healthy mice showing the feasibility of this approach.

Supplementary Figure 2

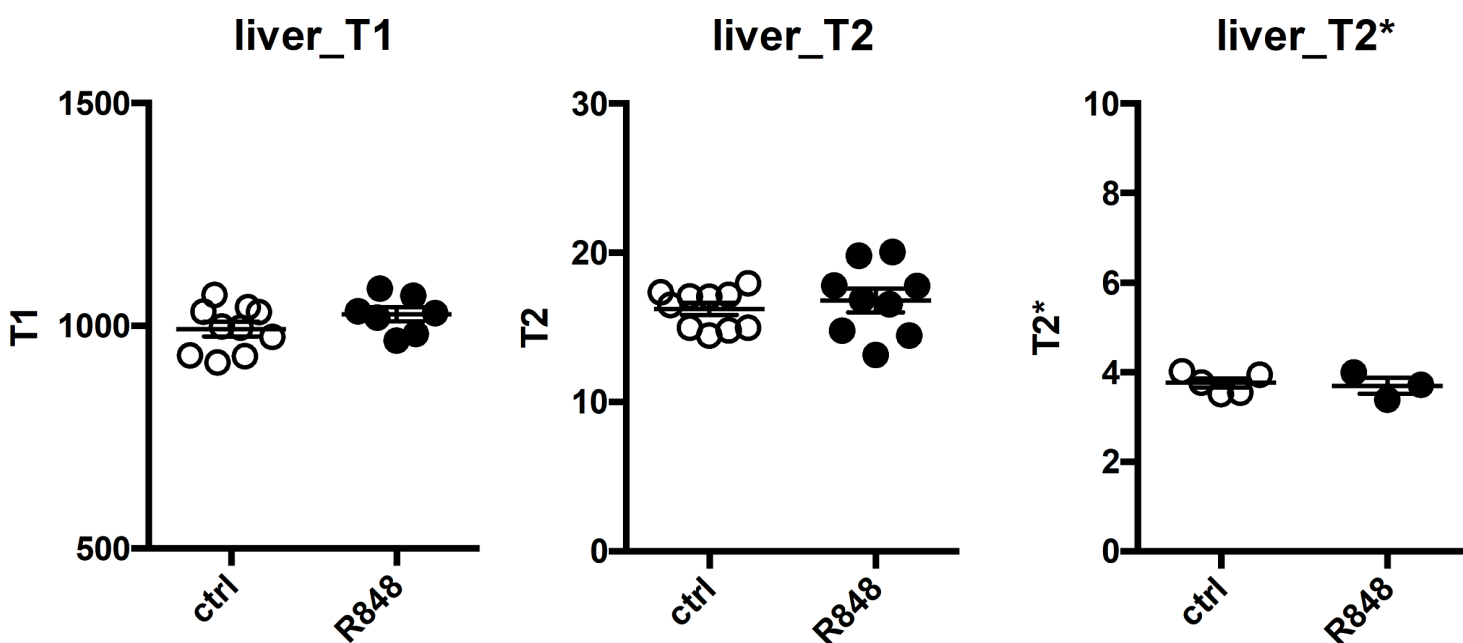

**Figure S2:** MRI mapping parameters in the liver appear largely normal. Potential iron deposition and inflammatory damage to the liver in Resiquimod treated mice was assessed by T<sub>1</sub>, T<sub>2</sub> and T<sub>2</sub><sup>\*</sup> measurements in MRI.
